# Supplementary material
Source: PubMed Central journal article supplement (PMC7724502)
Supplement: NIHMS1649490-supplement-Supplemental_figures_tables.pdf [file NIHMS1649490-supplement-Supplemental_figures_tables.pdf]

**Table S1. Residue preferences at furin cleavage sites**

| Position                                     | P6           | P5         | P4         | P3         | P2         | P1        | P1'        | P2'          | P3'          | P4'          | P5'        |
|----------------------------------------------|--------------|------------|------------|------------|------------|-----------|------------|--------------|--------------|--------------|------------|
| Most<br>Common<br>Residues at<br>Furin Sites | R<br>14.5%   | R<br>22.3% | R<br>85.6% | K<br>16.9% | K<br>45.8% | R<br>100% | S<br>33.1% | L/V<br>18.4% | S<br>13.6%   | A<br>11.9%   | A<br>12.6% |
|                                              | K/S<br>10.5% | S<br>13.2% | I<br>5.9%  | R<br>13.6% | R<br>36.4% | -         | A<br>15.7% | A<br>17.6%   | D/G<br>11.0% | Q/S<br>10.2% | G<br>10.9% |
|                                              | P/T<br>9.7%  | K<br>10.7% | V<br>4.2%  | S<br>11.9% | A<br>4.2%  | -         | F<br>10.2% | S<br>10.4%   | P<br>10.2%   | T<br>9.3%    | E<br>10.1% |
| PE Furin<br>Site                             | R<br>14.5%   | H<br>5.0%  | R<br>85.6% | Q<br>9.3%  | P<br>3.4%  | R<br>100% | G<br>7.1%  | W<br>0.8%    | E<br>5.9%    | Q<br>10.2%   | L<br>7.6%  |

**Table S2. HA22-LR variant proteins**

| RIT               | Antibody                            | Linker | Furin Site                   | Catalytic Domain       |
|-------------------|-------------------------------------|--------|------------------------------|------------------------|
| 1) HA22-LR        |                                     |        | R H R Q P R G W E Q L        |                        |
| 2) HA22-LR R274H  |                                     |        | <b>H</b> H R Q P R G W E Q L |                        |
| 3) HA22-LR H275R  |                                     |        | R <b>R</b> R Q P R G W E Q L |                        |
| 4) HA22-LR Q277R  |                                     |        | R H R <b>R</b> P R G W E Q L |                        |
| 5) HA22-LR P278K  | RFB4                                |        | R H R Q <b>K</b> R G W E Q L |                        |
| 6) HA22-LR R279G  | [GTHW]                              |        | R H R Q P <b>G</b> G W E Q L | PTGAE...REDLK          |
| 7) HA22-LR G280S  | anti-CD22                           | KASGG  | R H R Q P R <b>S</b> W E Q L | [Native PE<br>395-613] |
| 8) HA22-LR W281L  | disulfide-<br>stabilized<br>(ds)Fv* |        | R H R Q P R G <b>L</b> E Q L |                        |
| 9) HA22-LR E282D  |                                     |        | R H R Q P R G W <b>D</b> Q L |                        |
| 10) HA22-LR Q283T |                                     |        | R H R Q P R G W E <b>T</b> L |                        |
| 11) HA22-LR L284S |                                     |        | R H R Q P R G W E Q <b>S</b> |                        |
| 12) HA22-LR/FUR   |                                     |        | <b>H R R R K R G L D T S</b> |                        |
| 13) HA22          |                                     |        | Native PE 251-364            | Native PE 381-613      |

\*Salvatore, G., Beers, R., Margulies, I., Kreitman, R. J., and Pastan, I. (2002) Improved cytotoxic activity toward cell lines and fresh leukemia cells of a mutant anti-CD22 immunotoxin obtained by antibody phage display. *Clin. Cancer Res.* 8, 995-1002.

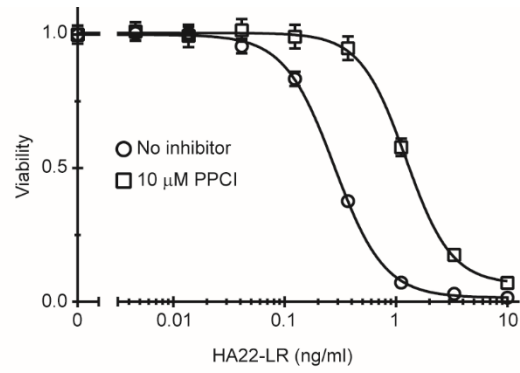

Supplementary Figure 1

**Figure S1. HA22-LR cytotoxicity in the presence of a furin inhibitor.**

The cytotoxicity of HA22-LR was evaluated against CA46 cells in the presence (open squares) and absence (open circles) of proprotein convertase inhibitor (PPCI).

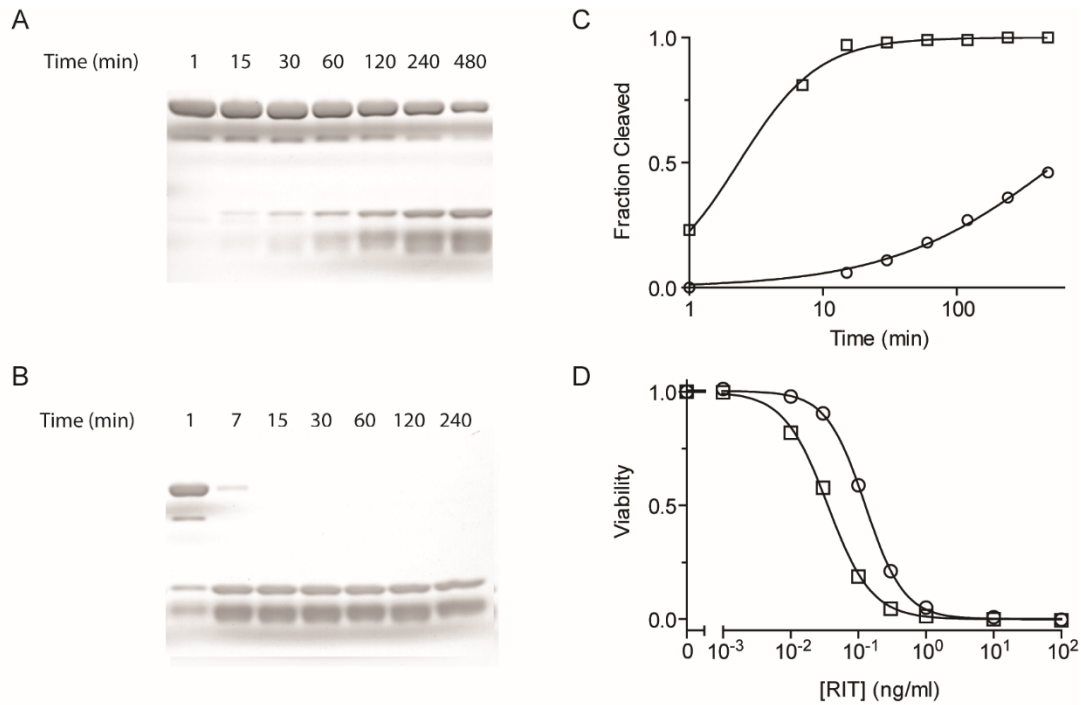

Supplementary Figure 2

**Figure S2. Representative analyses of furin site mutants.** An *in vitro* assay was used to evaluate the efficiency of furin cleavage (A-C). Example SDS-PAGE gels from assays evaluating (A) HA22-LR and (B) HA22-LR/FUR are shown. Band intensity was quantified by densitometry, plotted against time, and fit to a four-parameter sigmoid model (C). The cytotoxicity of each mutant was also evaluated on the CA46 cell line (D). HA22-LR (open circles;  $EC_{50} = 0.18$  ng/ml) and HA22-LR/FUR (open squares;  $EC_{50} = 0.04$  ng/ml) are shown. A comparison of the relative cytotoxicity and relative cleavage efficiency for all variants is presented in Figure 2.
